# Supplementary material for: A Pan-GTPase Inhibitor as a Molecular Probe
Source: PubMed Central journal article supplement (PMC4527730; doi:10.1371/journal.pone.0134317), 2015-08-06
Supplement: pone.0134317.s001.pdf [file pone.0134317.s001.pdf]

S1 Fig.

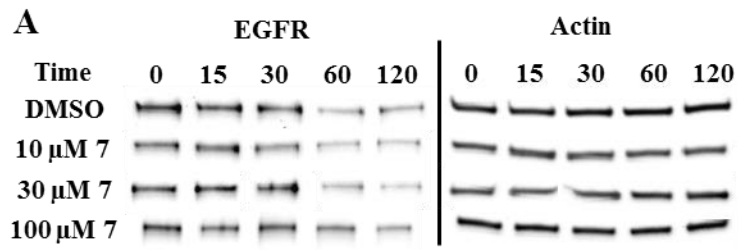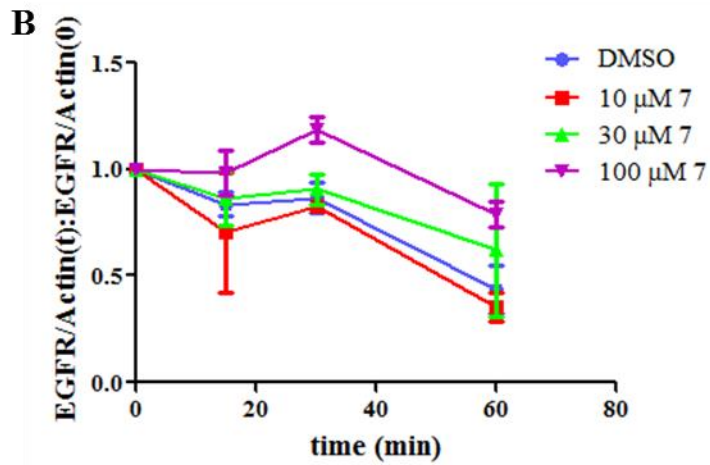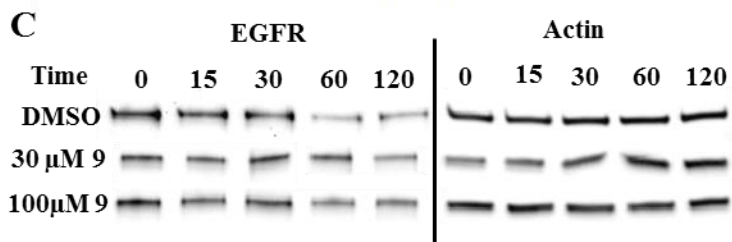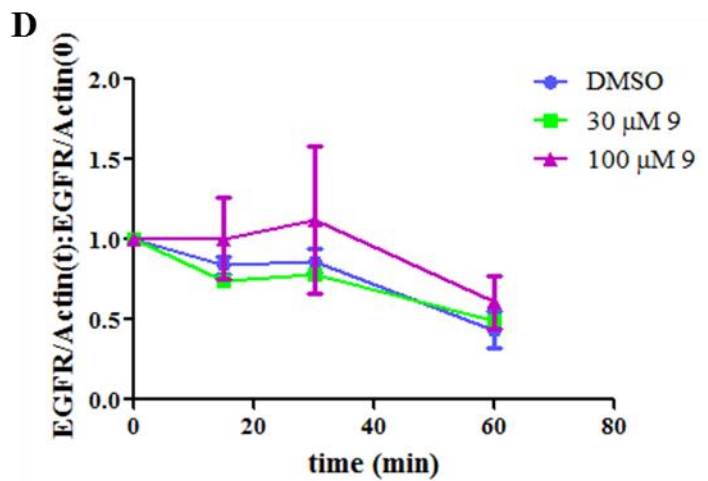

S1 Fig. continued

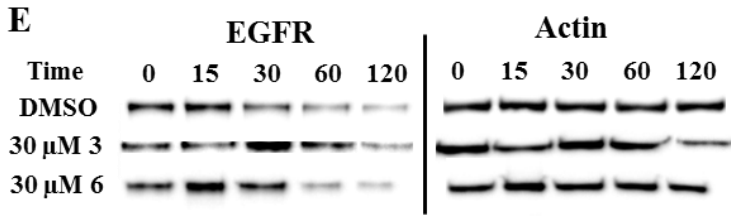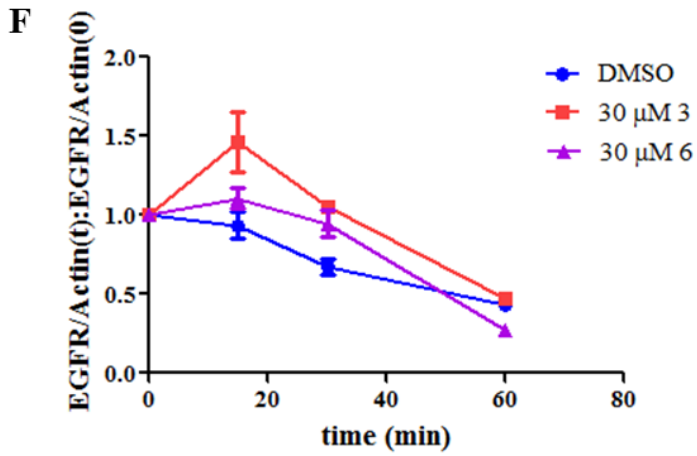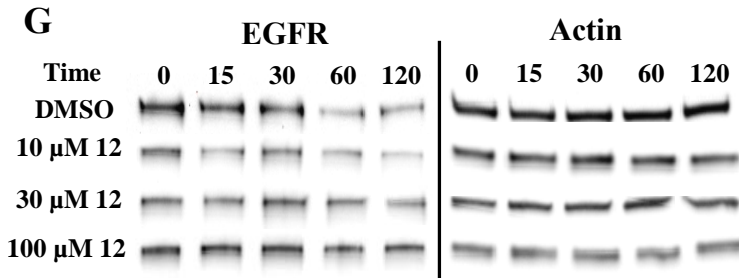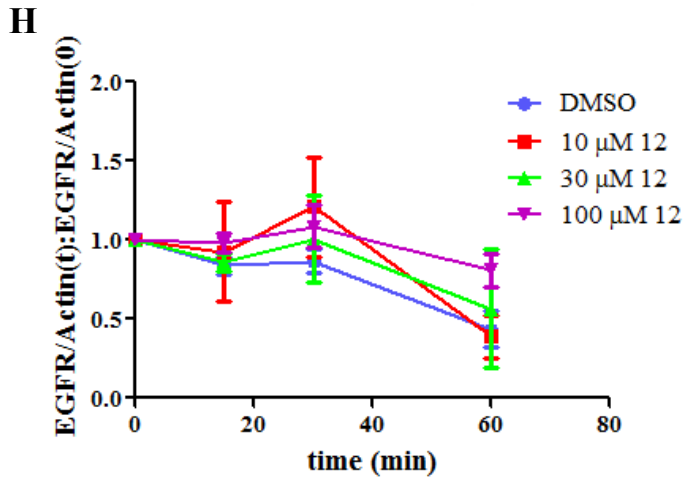

**S1 Fig. Analogues of 1 delayed EGFR degradation in SCC-12F cells.** A, C, E and G are representative blotting images. B, D, F, and H show the analyzed degradation time courses. Experiments for A, B, C, D, G and H were run as triplicates, while experiments for E and F were run as duplicates. Experimental details and data analysis are the same as described for Fig. 7.
