# Supplementary material for: A Pan-GTPase Inhibitor as a Molecular Probe
Source: PubMed Central journal article supplement (PMC4527730; doi:10.1371/journal.pone.0134317), 2015-08-06
Supplement: pone.0134317.s003.pdf [file pone.0134317.s003.pdf]

S3 Fig.

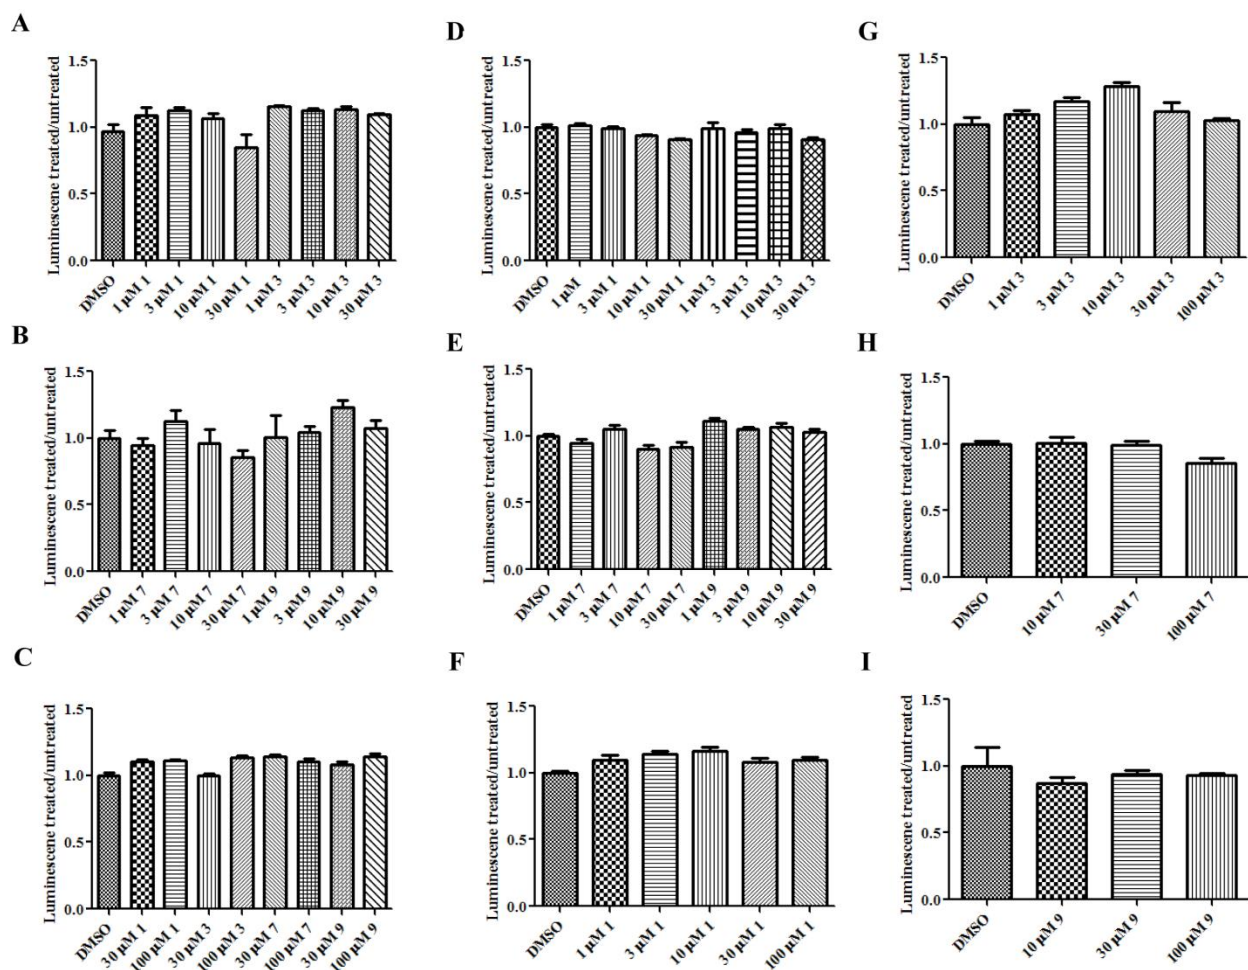

**S3 Fig. Cytotoxicity of 1 and analogues.** Compound 1 and its analogues did not show toxicity up to 100  $\mu$ M over the experimental time frame. Compounds tested in the U937 $\Delta$ ST cells for 24 h (A) and (B), and for 1 h (C). Compounds tested in SCC-12F cells for 24 h (D) and (E), and for 3 h (F-I). Data are reported as ratios of luminescence to that of the DMSO treated control.
