# Supplementary material for: A Pan-GTPase Inhibitor as a Molecular Probe
Source: PubMed Central journal article supplement (PMC4527730; doi:10.1371/journal.pone.0134317), 2015-08-06
Supplement: pone.0134317.s004.pdf [file pone.0134317.s004.pdf]

S1 Table

| CID      | structure derivation                                                                                                                        | EC50           |               |               |                 |               |                |               |
|----------|---------------------------------------------------------------------------------------------------------------------------------------------|----------------|---------------|---------------|-----------------|---------------|----------------|---------------|
|          |                                                                                                                                             | Rab7           | H-Ras         | H-Ras G12V    | Cdc42           | Cdc42 Q61L    | RhoA           | Rac1          |
| 1067700  | X=O;R <sub>1</sub> =Me;R <sub>2</sub> =Me;R <sub>3</sub> =OH;R <sub>4</sub> =CS-NH-CO; R <sub>5</sub> =phenyl                               | 0.12 ± 0.055   | 0.16 ± 0.16   | 0.052 ± 0.044 | 1.09 ± 1.62     | 0.047 ± 0.038 | 0.062 ± 0.049  | 0.062 ± 0.049 |
| 1251121  | R <sub>3</sub> =OMe                                                                                                                         | >1000          | >1000         | >1000         | >1000           | >1000         | NA             | NA            |
| 46916263 | R <sub>1</sub> =H                                                                                                                           | 0.14 ± 0.11    | 0.13 ± 0.10   | 0.13 ± 0.12   | 9.09 ± 12.28    | 4.04 ± 5.58   | 0.12 ± 0.07    | 0.08 ± 0.03   |
| 46916266 | R <sub>1</sub> =H;R <sub>2</sub> =H                                                                                                         | 0.16 ± 0.067   | 0.17 ± 0.094  | 0.12 ± 0.12   | 0.11 ± 0.064    | 0.13 ± 0.078  | 0.23 ± 0.21    | 0.18 ± 0.13   |
| 53377401 | R <sub>2</sub> =Et                                                                                                                          | 0.032 ± 0.0073 | 0.028 ± 0.011 | 0.035         | 2.2 ± 3.7       | 0.077 ± 0.087 | 0.046          | 0.053         |
| 53377399 | R <sub>1</sub> =H;R <sub>2</sub> =t-butyl                                                                                                   | 0.47           | 0.14          | 0.13          | 1.57            | 0.94          | 0.20           | 0.14          |
| 53377403 | R <sub>1</sub> -R <sub>2</sub> =(CH <sub>2</sub> ) <sub>4</sub> -                                                                           | 0.04           | 0.03          | 0.03          | NA              | NA            | 0.10           | 0.06          |
| 740871   | R <sub>4</sub> =CO-CH <sub>2</sub>                                                                                                          | >1000          | >1000         | >1000         | >1000           | >1000         | NA             | NA            |
| 1280844  | R <sub>4</sub> =CS-NH                                                                                                                       | NA             | NA            | 3.55          | 391.00          | 125.70        | 1.39           | 4.06          |
| 46916265 | R <sub>4</sub> =CO-NH-CO                                                                                                                    | 0.31 ± 0.09    | 0.44 ± 0.41   | 0.49 ± 0.48   | 17.00           | 0.47          | 0.33 ± 0.03    | 0.35 ± 0.05   |
| 53377397 | R <sub>5</sub> =2-MeO-phenyl                                                                                                                | 1.12           | 1.32          | 0.81          | 20.77           | 2.35          | NA             | NA            |
| 53301934 | R <sub>5</sub> =3-MeO-phenyl                                                                                                                | 0.15 ± 0.13    | 0.13 ± 0.13   | 0.12 ± 0.12   | 0.58 ± 0.83     | 0.50 ± 0.71   | 0.20 ± 0.13    | 0.19 ± 0.06   |
| 53301932 | R <sub>5</sub> =4-MeO-phenyl                                                                                                                | 0.14 ± 0.07    | 0.14 ± 0.09   | 0.17 ± 0.10   | 1.2 ± 1.0       | 0.23 ± 0.039  | 0.15 ± 0.06    | 0.13 ± 0.06   |
| 53301935 | R <sub>5</sub> =2-F-phenyl                                                                                                                  | 0.14 ± 0.16    | 0.15 ± 0.18   | 0.12 ± 0.14   | 3.72 ± 5.15     | 0.79 ± 1.13   | 0.18 ± 0.22    | 0.18 ± 0.24   |
| 53301930 | R <sub>5</sub> =3-F-phenyl                                                                                                                  | 0.32 ± 0.09    | 0.33 ± 0.09   | 0.38 ± 0.14   | 21.17 ± 35.48   | 2.20 ± 3.14   | 0.47 ± 0.14    | 0.48 ± 0.01   |
| 53377405 | R <sub>5</sub> =4-F-phenyl                                                                                                                  | 0.41 ± 0.19    | 0.33 ± 0.22   | 0.091         | 1.0 ± 1.2       | 0.88 ± 0.47   | 0.11           | 0.15          |
| 53301931 | R <sub>5</sub> =2-Br-phenyl                                                                                                                 | 0.43 ± 0.68    | 0.62 ± 1.00   | 0.43 ± 0.68   | 46.77 ± 66.01   | 14.76 ± 20.80 | 0.48 ± 0.74    | 0.60 ± 0.80   |
| 53301936 | R <sub>5</sub> =3-Br-phenyl                                                                                                                 | 2.51 ± 2.10    | 1.72          | 1.08          | 191.81 ± 243.66 | 23.67 ± 23.88 | >1000          | 31.06         |
| 53301933 | R <sub>5</sub> =4-Br-phenyl                                                                                                                 | 0.30 ± 0.18    | 0.33 ± 0.24   | 0.32 ± 0.22   | 25.86 ± 44.07   | 10.89 ± 18.37 | 0.32 ± 0.13    | 0.26 ± 0.11   |
| 53377404 | R <sub>5</sub> =2-Me-phenyl                                                                                                                 | 0.41           | 0.44          | 0.38          | 2.66            | 1.35          | 0.49           | 0.44          |
| 53377400 | R <sub>5</sub> =3-Me-phenyl                                                                                                                 | 1.16           | 1.39          | 0.85          | 5.87            | 1.83          | 1.45           | 1.51          |
| 53377395 | R <sub>5</sub> =4-Me-phenyl                                                                                                                 | 0.14           | 0.19          | 0.18          | 0.53            | 0.43          | 0.13           | 0.15          |
| 53377402 | R <sub>5</sub> =2-furyl                                                                                                                     | 0.074          | 0.079         | 0.065         | 16.17           | 0.33          | 0.092          | 0.059         |
| 53377398 | R <sub>5</sub> =2-thiophene                                                                                                                 | 0.025          | 0.035         | 0.024         | NA              | NA            | 0.033          | 0.029         |
| 53301937 | X=CH <sub>2</sub>                                                                                                                           | 0.066 ± 0.017  | 0.067 ± 0.024 | 0.077 ± 0.024 | 0.28 ± 0.16     | 0.17 ± 0.086  | 0.071 ± 0.0096 | 0.068 ± 0.020 |
| 974814   | R <sub>3</sub> =OMe; R <sub>4</sub> =none; R <sub>5</sub> =none                                                                             | >1000          | >1000         | >1000         | >1000           | >1000         | NA             | NA            |
| 1097649  | R <sub>3</sub> =OEt; R <sub>4</sub> =CS-NH                                                                                                  | >1000          | >1000         | >1000         | >1000           | >1000         | NA             | NA            |
| 46916262 | R <sub>1</sub> =H;R <sub>2</sub> =H;R <sub>3</sub> =OC(CH <sub>3</sub> ) <sub>3</sub>                                                       | >1000          | >1000         | >1000         | >1000           | >1000         | NA             | NA            |
| 2810966  | X=NMe;R <sub>1</sub> =H;R <sub>2</sub> =H;R <sub>3</sub> =OEt; R <sub>4</sub> =CO-NH; R <sub>5</sub> =4-F-phenyl                            | >1000          | >1000         | >1000         | >1000           | >1000         | NA             | NA            |
| 2810963  | X=NMe;R <sub>1</sub> =H;R <sub>2</sub> =H;R <sub>3</sub> =OEt; R <sub>4</sub> =CO-NH; R <sub>5</sub> =4-Me-phenyl                           | >1000          | >1000         | >1000         | >1000           | >1000         | NA             | NA            |
| 2810964  | X=NMe;R <sub>1</sub> =H;R <sub>2</sub> =H;R <sub>3</sub> =OEt; R <sub>4</sub> =CO-NH-C(CH <sub>3</sub> ) <sub>3</sub> ;R <sub>5</sub> =none | >1000          | >1000         | >1000         | >1000           | >1000         | NA             | NA            |
| 46916261 | X=NMe;R <sub>1</sub> =H;R <sub>2</sub> =H;R <sub>3</sub> -R <sub>4</sub> =-O-C(=N)-NH-;R <sub>5</sub> =4-F-phenyl                           | >1000          | >1000         | >1000         | >1000           | >1000         | NA             | NA            |
| 46916264 | X=NMe;R <sub>1</sub> =H;R <sub>2</sub> =H;R <sub>3</sub> -R <sub>4</sub> =-O-C(=N)-NH-;R <sub>5</sub> =4-Me-phenyl                          | >1000          | >1000         | >1000         | >1000           | >1000         | NA             | NA            |
| 46916260 | X=NMe;R <sub>1</sub> =H;R <sub>2</sub> =H;R <sub>4</sub> =CO-NH;R <sub>5</sub> =4-F-phenyl                                                  | >1000          | >1000         | >1000         | >1000           | >1000         | NA             | NA            |
| 46916259 | X=NMe;R <sub>1</sub> =H;R <sub>2</sub> =H;R <sub>4</sub> =CO-NH;R <sub>5</sub> =4-Me-phenyl                                                 | 49.30          | 30.20         | 32.20         | 26.20           | 28.00         | NA             | NA            |

**S1 Table. Analogues of compound 1 and EC<sub>50</sub> values.** Analogues of compound **1** and EC<sub>50</sub> values. Derivatization sites were indicated as in the main text Figure 1. For EC<sub>50</sub>s with standard deviations, the values were the averages from multiple measurements. It is observed that the standard deviations for compound **1** and some of its analogs against Cdc42 are large. Therefore, the biochemical data for Cdc42 when needed for comparison is from a single set of experiments (Table 2 and Figure 2). For EC<sub>50</sub>s reported without standard deviations, the values were determined from one measurement carried out in duplicate where all the data points were used to fit the sigmoidal dose-response equation. EC<sub>50</sub> values were noted NA when they were not available or data did not give acceptable fit.
